# Supplementary material for: A caveat to common hemicyanine dye components and their resolution
Source: Royal Society of Chemistry journal article supplement (doi:10.1039/d0cc01833c), 2020-01-01

## Electronic Supplementary Information

### A Caveat to Common Hemicyanine Dye Components and Its Resolution

Hyeon Jin Park, Chang Wook Song, Sourav Sarkar, Yong Woong Jun, Ye Jin Reo, Mingchong Dai, and Kyo  
Han Ahn\*

Department of Chemistry, Pohang University of Science and Technology (POSTECH), 77 Cheongam Ro,  
Nam-Gu, Pohang, Gyungbuk 37673, Republic of Korea.

\*Corresponding authors; Email address: ahn@postech.ac.kr (K. H. Ahn)

### Contents

|                                              |    |
|----------------------------------------------|----|
| General information .....                    | 2  |
| Spectroscopic analysis .....                 | 2  |
| Synthesis .....                              | 3  |
| Photophysical properties .....               | 4  |
| Gaussian calculation.....                    | 5  |
| Stability data .....                         | 6  |
| Solubility assessment .....                  | 7  |
| Activatable hemicyanine probes selected..... | 8  |
| Table of photophysical data .....            | 9  |
| NMR data.....                                | 10 |
| HRMS data.....                               | 14 |

**General information.** The chemical reagents were purchased from Sigma Aldrich or Alfa Aesar. Commercially available reagents were used without further purification. Anhydrous solvents for organic synthesis were prepared by passing through a solvent purification tower. All reactions were performed under argon atmosphere unless otherwise stated. Thin-layer chromatography (TLC) was performed on precoated silica gel 60F-254 glass plates and visualized with ultraviolet light.  $^1\text{H}$  and  $^{13}\text{C}$  NMR spectra were measured with a Bruker AVANCE III 300MHZ and AVANCE III 500 MHZ FT-NMR spectrometer. Coupling constants ( $J$  value) are reported in Hertz. The chemical shifts ( $\delta$ ) are shown in ppm. Spectra are referenced to residual  $\text{CHCl}_3$  (7.26 ppm,  $^1\text{H}$ ; 77.16 ppm,  $^{13}\text{C}$ ) and DMSO (2.50 ppm,  $^1\text{H}$ ; 39.51 ppm,  $^{13}\text{C}$ ). High resolution mass spectra was recorded on a JE JMS-700 spectrometer at the Korea Basic Science Center, Kyungpook National University and the values are reported in units of mass to charge ( $m/z$ ).  $\text{Na}_2\text{S}$ ,  $\text{NaOCl}$ , and  $\text{NaHSO}_3$  were used as the source of  $\text{H}_2\text{S}$ ,  $\text{HOCl}$ , and  $\text{HSO}_3^-$ , respectively.

**Spectroscopic analysis.** UV/Vis absorption spectra were obtained using a HP 8453 UV/Vis spectrophotometer. Fluorescence spectra were recorded on a Photon Technical International Fluorescence System with a 3.0 mL quartz cell with 1.0-cm standard path length. 1.0 mM stock solutions were prepared in DMSO. All photo-physical studies were conducted with solutions of the probe at 10  $\mu\text{M}$ . Quantum yields were calculated using the following equation using Rhodamine 6G ( $\Phi_{\text{F}} = 0.95$  in EtOH) as standard, where  $\Phi$  is the quantum yield,  $I$  is the measured emission intensity,  $\eta$  is the refractive index of the media and  $A$  is the absorbance. Subscript 'r' stands for reference.

$$\Phi = \Phi_r \left( \frac{\eta}{\eta_r} \right)^2 \left( \frac{I}{I_r} \right) \left( \frac{A_r}{A} \right) \dots\dots\dots (1)$$

**Synthesis.** Compound **5** was prepared following the reported synthetic procedure by us (*Dyes and Pigments* **2019**, 171, 107718).

**NVId.** A mixture of 6-(pyrrolidin-1-yl)-2-naphthaldehyde (**2**) (30 mg, 0.133 mmol) and 1,2,3,3-tetramethyl-3H-indol-1-ium iodide (60.15 mg, 0.200 mmol) in EtOH (1mL) was refluxed overnight. The solvent was evaporated under reduced pressure, and the crude product was purified by flash column chromatography on silica gel to afford **NVId** as a blue solid (80 mg, 70%). <sup>1</sup>H NMR (CDCl<sub>3</sub>, 500 MHz, 298 K), δ 8.547 (s, 1H), 8.24 (d, 1H), 7.95 (m, 2H), 7.47 (m, 5H), 6.89 (q, 1H), 6.59 (s, 1H), 4.24 (s, 3H), 3.39 (s, 4H), 2.04 (s, 4H), and 1.79 (s, 6H); <sup>13</sup>C NMR (CDCl<sub>3</sub>, 500 MHz, 293 K) δ 180.39, 155.54, 149.19, 142.51, 141.71, 139.22, 137.09, 132.63, 129.44, 128.74, 127.16, 127.13, 127.17, 125.71, 122.58, 116.66, 113.91, 108.22, 105.29, 51.74, 48.00, 36.33, 27.48, and 25.54; HRMS: *m/z* calcd. for C<sub>27</sub>H<sub>29</sub>N<sub>2</sub>, 381.53; found, 381.233.

**NVBt.** A mixture of compound **2** (30 mg, 0.133 mmol) and 2,3-dimethylbenzo[d]thiazol-3-ium iodide (38 mg, 0.133 mmol) in EtOH (2.5 mL) was refluxed overnight. The solvent was evaporated under reduced pressure, and the crude product was purified by flash column chromatography on silica gel to afford **NVBt** as a blue solid (82.8 mg, 80%). <sup>1</sup>H NMR (DMSO, 500 MHz, 298 K), δ 8.369 (d, 1H), 8.272 (s, 1H), 8.170 (t, 1H), 8.037 (m, 1H), 7.817 (m, 3H), 7.726 (m, 2H), 7.053 (q, 1H), 6.774 (d, 1H), 4.2864 (s, 3H), 3.379 (t, 4H), and 2.008 (t, 4H); <sup>13</sup>C NMR (DMSO, 500 MHz, 293 K) δ 171.50, 149.54, 147.77, 141.96, 137.26, 133.95, 130.72, 129.11, 127.92, 127.38, 126.77, 126.42, 124.85, 124.75, 124.00, 116.68, 116.37, 109.98, 104.63, 79.18, 47.43, 35.95, and 24.98; HRMS: *m/z* calcd. for C<sub>24</sub>H<sub>23</sub>N<sub>2</sub>S, 371.16; found, 371.159.

**NVPy.** A mixture of compound **2** (30 mg, 0.133 mmol), piperidine (2.0 μL) and 1,4-dimethylpyridin-1-ium trifluoromethanesulfonate (31 mg, 0.121 mmol) was refluxed in EtOH overnight. The solvent was evaporated under reduced pressure, and the crude product was purified by flash silica gel column chromatography to afford **NVPy** as an orange solid (13.9 mg, 18%). <sup>1</sup>H NMR (DMSO, 500 MHz, 298 K), δ 8.778 (d, 2H), 8.160 (d, 2H), 8.084 (d, 1H), 7.977 (s, 1H), 7.769 (m, 2H), 7.769 (m, 2H), 7.696 (d, 1H), 7.421 (d, 1H), 7.010 (q, 1H), 6.797 (d, 1H), 4.217 (s, 3H), 3.389 (t, 4H), and 2.013 (t, 4H), <sup>13</sup>C NMR (DMSO, 500 MHz, 293 K) δ 152.93, 146.95, 144.74, 141.67, 136.16, 130.56, 129.90, 127.77, 126.43, 125.18, 123.92, 122.82, 120.32, 116.52, 104.49, 47.44, 46.64, and 25.02; HRMS: *m/z* calcd. for C<sub>22</sub>H<sub>23</sub>N<sub>2</sub>, 315.19; found, 315.186.

## Photophysical properties.

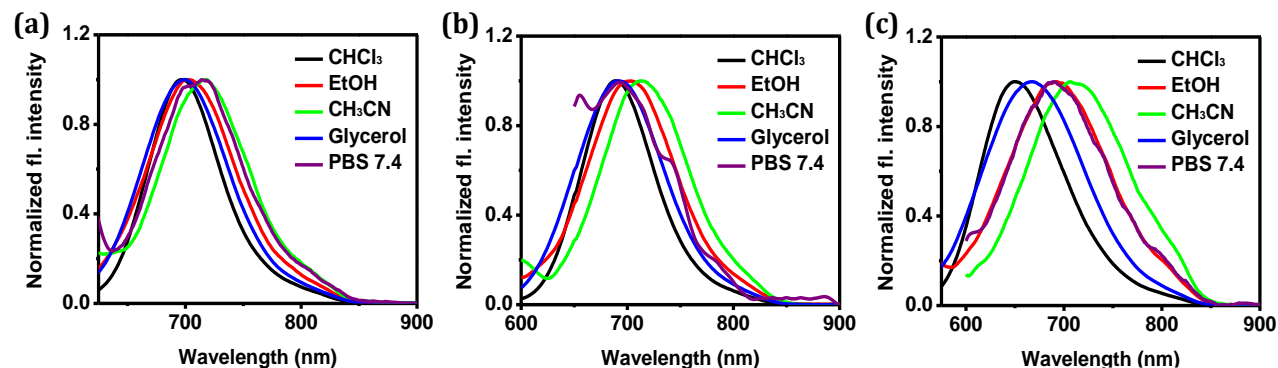

**Figure S1.** Normalized emission spectra of (a) **NVId**, (b) **NVBt**, and (c) **NVPy** (each at 10  $\mu$ M) in solvents in the order of increasing dielectric constant: chloroform (4.81), ethanol (24.5), acetonitrile (37.5), glycerol (46.5), and pH 7.4 PBS (80.1) at 25  $^{\circ}$ C.

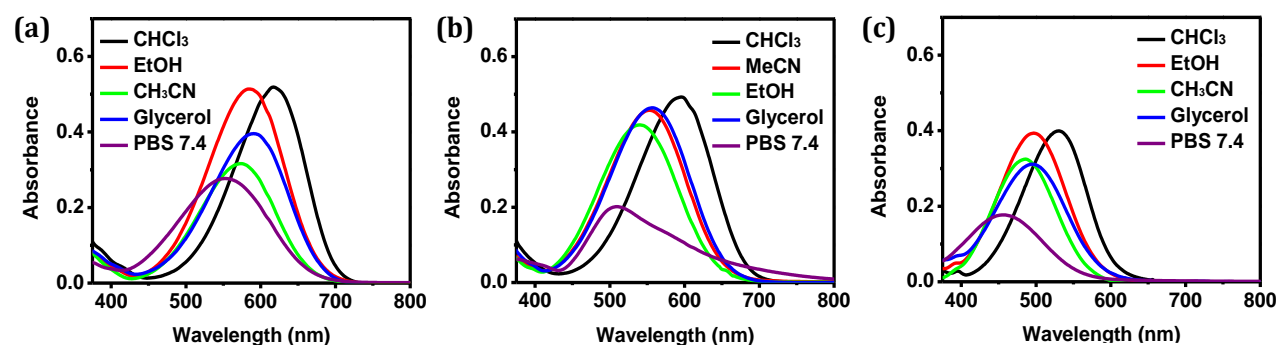

**Figure S2.** Absorption spectra of (a) **NVId**, (b) **NVBt**, and (c) **NVPy** (each at 10  $\mu$ M) in solvents in the order of increasing dielectric constant: chloroform (4.81), ethanol (24.5), acetonitrile (37.5), glycerol (46.5), and pH 7.4 PBS 7.4 (80.1) at 25  $^{\circ}$ C.

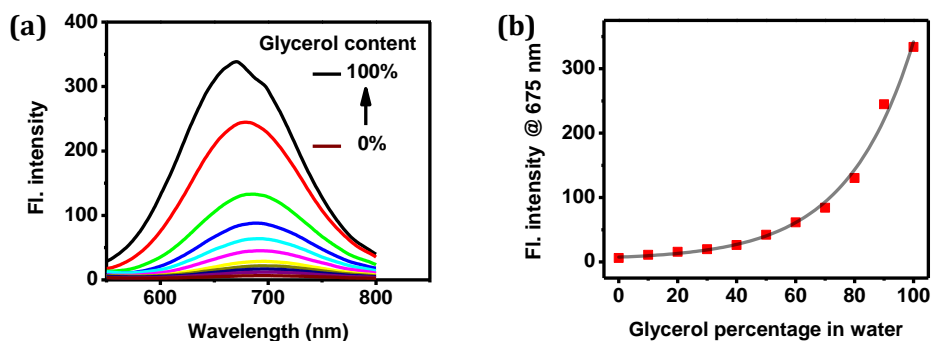

**Figure S3.** Fluorescence intensity changes of **NVPy** depending on the medium viscosity: (a) Fluorescence spectral changes; (b) plot of the fluorescence intensity depending on the glycerol percentage in a glycerol–water binary medium.

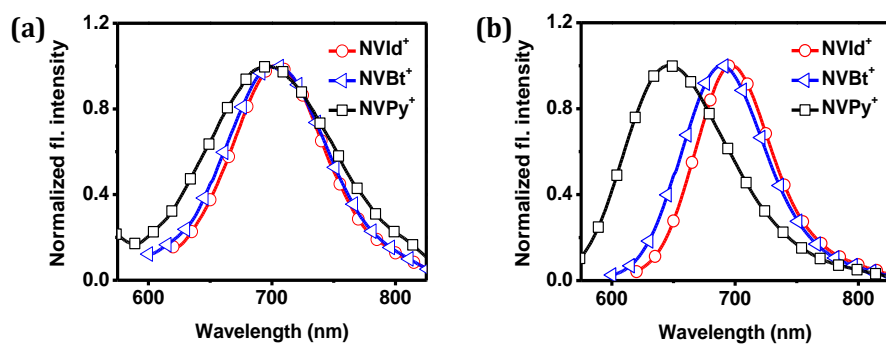

**Figure S4.** Normalized fluorescence spectra of **NVId**, **NVBt**, and **NVPy** (each at 10  $\mu$ M) in (a) EtOH and (b) chloroform, obtained under excitation at the maximum absorption wavelength ( $\lambda_{\text{max}}$ ) of each compound at 25  $^{\circ}$ C.

#### Gaussian calculation:

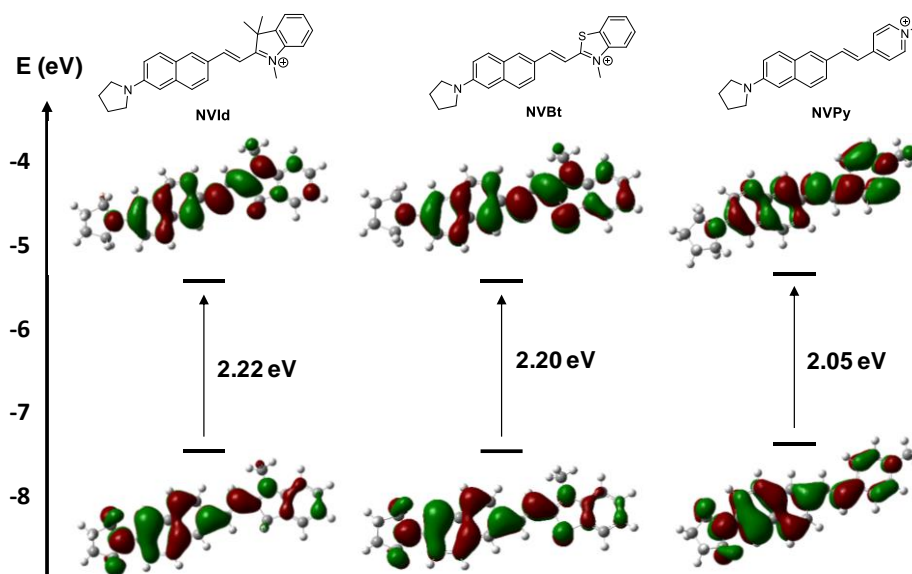

**Figure S5.** Frontier molecular orbitals of **NVId**, **NVBt** and **NVPy** calculated with Gaussian'09 using hybrid function B3LYP and 6-31 G(d,p) basis set in vacuum.

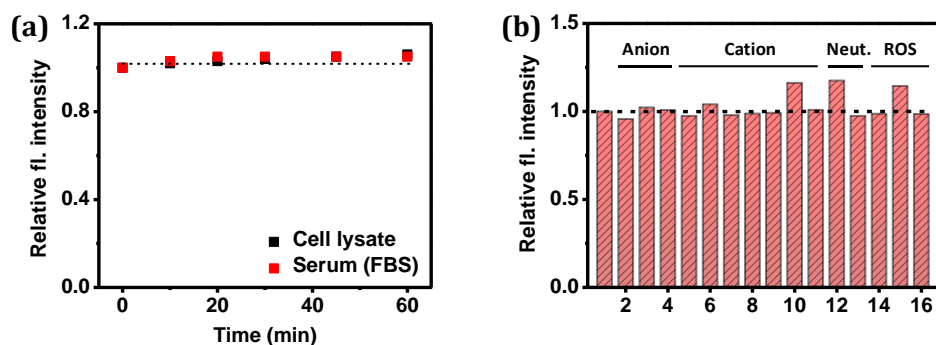

**Figure S6.** (a) Fluorescence intensity changes of **NVPy** (10 μM) in A549 cell lysate or in serum (FBS), monitored up to 1 h. (b) Fluorescence intensity changes of **NVPy** (10 μM) in the presence of various bio-analytes (200 μM) in PBS 7.4: (1) **NVPy** only, (2)  $\text{NO}_3^-$ , (3)  $\text{CN}^-$ , (4)  $\text{NO}^-$  [source: Angeli's salt ( $\text{Na}_2\text{N}_2\text{O}_3$ )], (5)  $\text{Na}^+$ , (6)  $\text{K}^+$ , (7)  $\text{Ca}^{2+}$ , (8)  $\text{Mg}^{2+}$ , (9)  $\text{Zn}^{2+}$ , (10)  $\text{Cu}^{2+}$ , (11)  $\text{Fe}^{3+}$ , (12)  $\text{NO}$  [source:  $\text{Na}_2[\text{Fe}(\text{CN})_5\text{NO}]$  at pH 5], (13) glucose, (14)  $^1\text{O}_2$  [source:  $\text{Na}_2\text{MO}_4 + \text{H}_2\text{O}_2$ ], (15)  $\bullet\text{OH}$  [Source:  $\text{FeSO}_4 + \text{H}_2\text{O}_2$ ], or (16)  $\text{O}_2^-$  [Source: solid  $\text{KO}_2$ ]. Data was taken after 30 min of analyte addition under excitation at 460 nm.

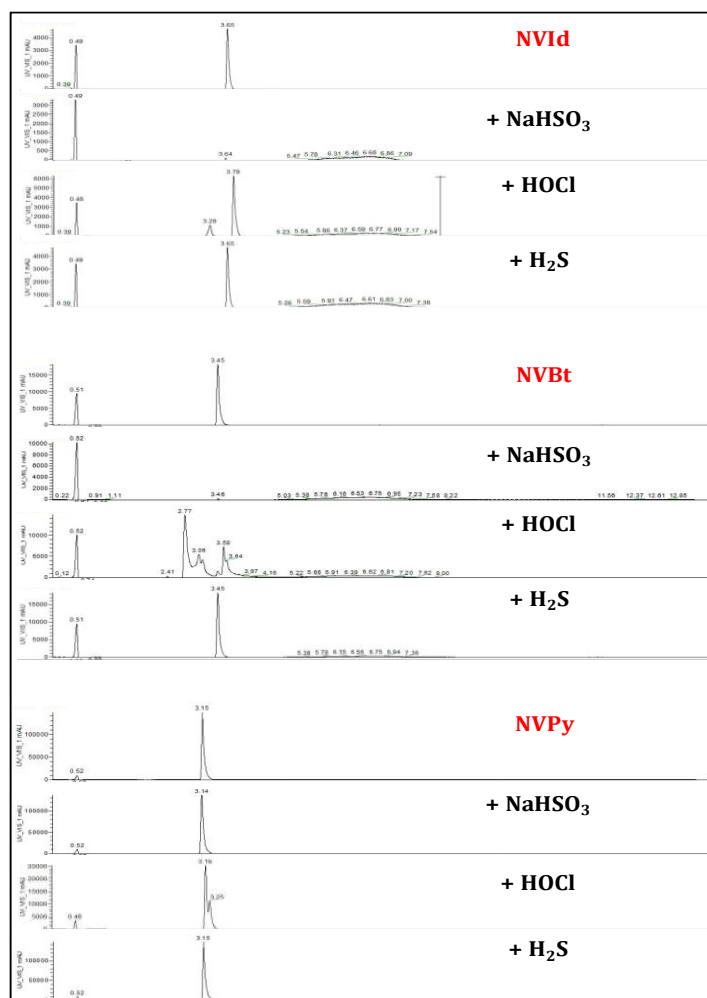

**Figure S7.** Stability of **NVID**, **NVBt**, and **NVPy** toward  $\text{NaHSO}_3$ ,  $\text{HOCl}$  and  $\text{H}_2\text{S}$ , analyzed by LC-MS.

### Solubility assessment of NVPy.

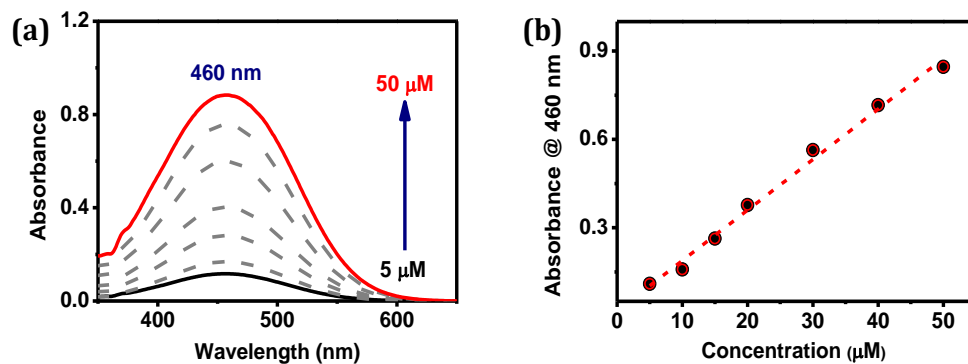

**Figure S8.** (a) UV/Vis Absorption spectra of **NVPy** at different concentrations (5–50  $\mu\text{M}$ ) in PBS (10 mM, pH 7.4) (b) Plot of absorbance vs. concentration.

### Activatable hemicyanine probes selected:

**Table S1.** Selected examples of activatable probes based on hemicyanine scaffolds.

| Analyte                       | Probe structure                                                                     | Reference                                             |
|-------------------------------|-------------------------------------------------------------------------------------|-------------------------------------------------------|
| Cys                           | 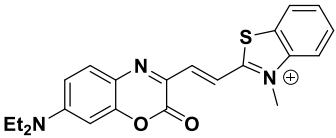   | <i>Sensors and Actuators B</i> <b>2013</b> , 178, 525 |
| GSH                           |    | <i>J. Am. Chem. Soc.</i> <b>2014</b> , 136, 574       |
| HSO <sub>3</sub> <sup>-</sup> |    | <i>Org. Biomol. Chem.</i> <b>2017</b> , 15, 2734      |
|                               |   | <i>Chem. Sci.</i> , <b>2013</b> , 4, 2892             |
| HOCl                          |  | <i>RSC Adv.</i> <b>2014</b> , 4, 59535                |
|                               |  | <i>J. Chem. Sci.</i> <b>2019</b> , 131:36             |
| H <sub>2</sub> S              |  | <i>Chem. Commun.</i> , <b>2016</b> , 52, 6415         |
| ONOO <sup>-</sup>             |  | <i>Chem. Commun.</i> , <b>2018</b> , 54, 11590        |

**Table S2.** Photophysical properties of **NVId**, **NVBt**, and **NVPy**.

| Dye <sup>[a]</sup> | Solvent            | $\lambda_{\text{abs}}$ (nm) | $\epsilon$ <sup>[b]</sup> | $\lambda_{\text{em}}$ <sup>[c]</sup> (nm) | $\Phi_{\text{F}}$ <sup>[d]</sup> | Stokes shift |
|--------------------|--------------------|-----------------------------|---------------------------|-------------------------------------------|----------------------------------|--------------|
| <b>NVId</b>        | CHCl <sub>3</sub>  | 617                         | 51880                     | 697                                       | 0.024                            | 80           |
|                    | EtOH               | 583                         | 51371                     | 703                                       | 0.011                            | 120          |
|                    | CH <sub>3</sub> CN | 573                         | 31622                     | 717                                       | n.d.                             | 144          |
|                    | Glycerol           | 591                         | 39551                     | 698                                       | 0.05                             | 107          |
|                    | PBS                | 554                         | 27673                     | 715                                       | n.d.                             | 161          |
| <b>NVBt</b>        | CHCl <sub>3</sub>  | 596                         | 49272                     | 690                                       | 0.03                             | 94           |
|                    | EtOH               | 552                         | 45744                     | 702                                       | 0.016                            | 150          |
|                    | CH <sub>3</sub> CN | 541                         | 41855                     | 715                                       | n.d.                             | 174          |
|                    | Glycerol           | 558                         | 46389                     | 692                                       | 0.05                             | 134          |
|                    | PBS                | 510                         | 20144                     | 695                                       | n.d.                             | 185          |
| <b>NVPy</b>        | CHCl <sub>3</sub>  | 530                         | 39,900                    | 652                                       | 0.04                             | 122          |
|                    | EtOH               | 497                         | 39,300                    | 692                                       | 0.014                            | 195          |
|                    | CH <sub>3</sub> CN | 485                         | 33,600                    | 715                                       | n.d.                             | 230          |
|                    | Glycerol           | 495                         | 31,100                    | 668                                       | 0.04                             | 171          |
|                    | PBS                | 455                         | 17,700                    | 692                                       | n.d.                             | 237          |

[a] All the measurements were conducted at 25 °C at 10  $\mu\text{M}$  dye concentration. [b] in unit,  $\text{L M}^{-1} \text{cm}^{-1}$ . [c] Measured under excitation at the maximum absorption wavelength in the given solvent. [d] Quantum yields determined using rhodamine 6G as a reference ( $\Phi_{\text{F}} = 0.95$  in EtOH). The n.d. stands for “not determined”.

**<sup>1</sup>H NMR data.**

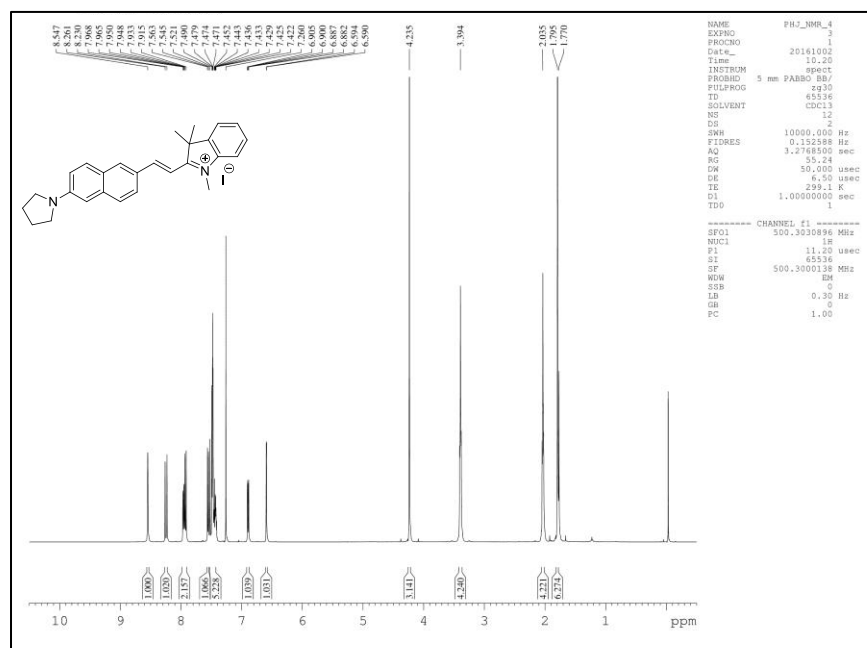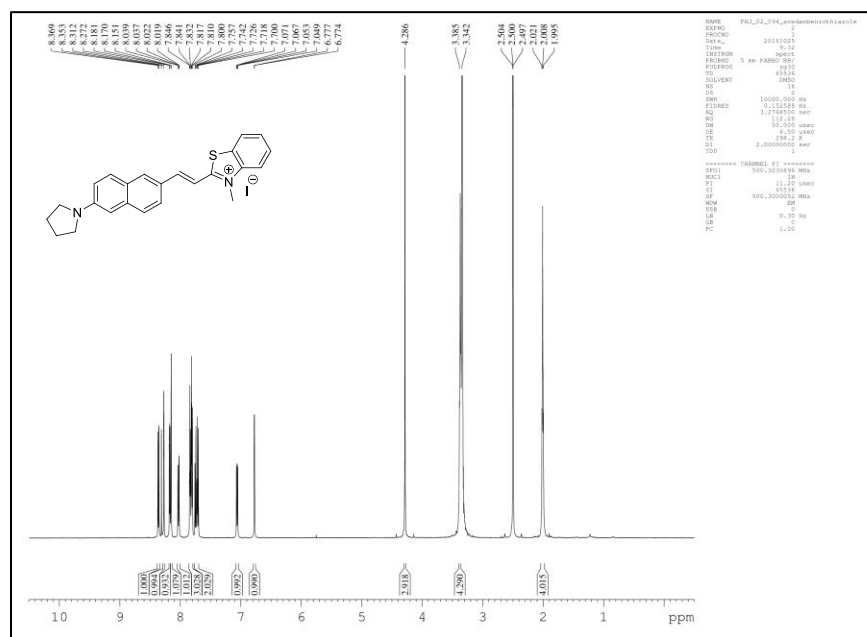



# <sup>13</sup>C NMR data.

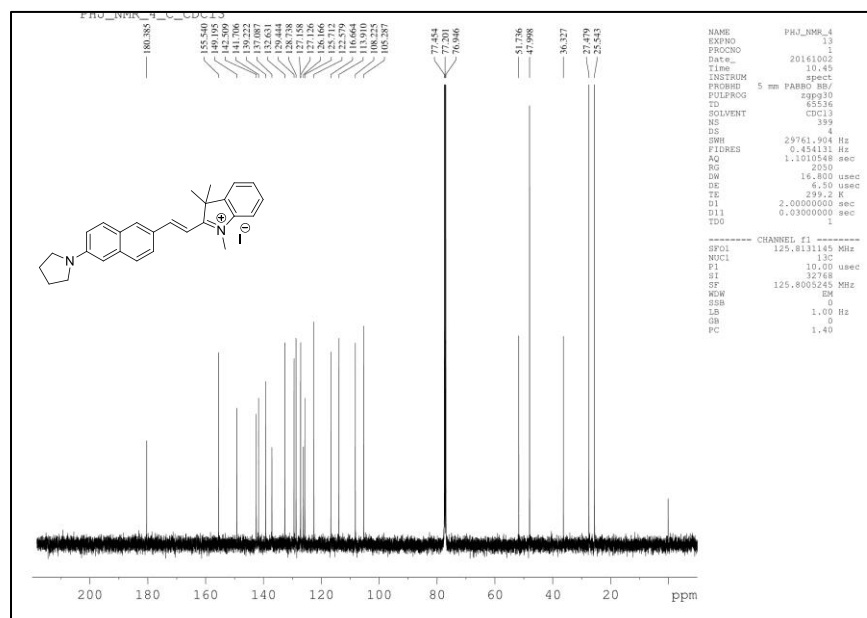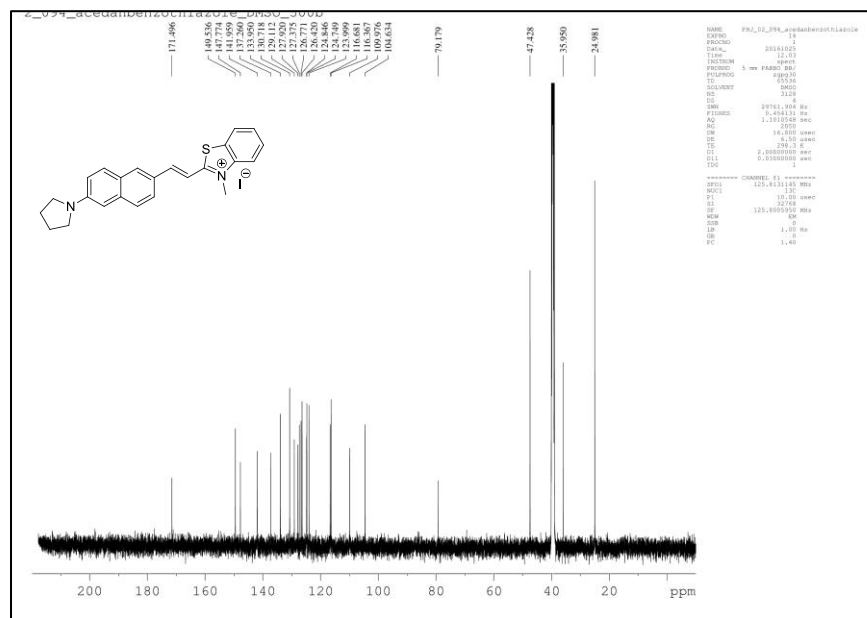

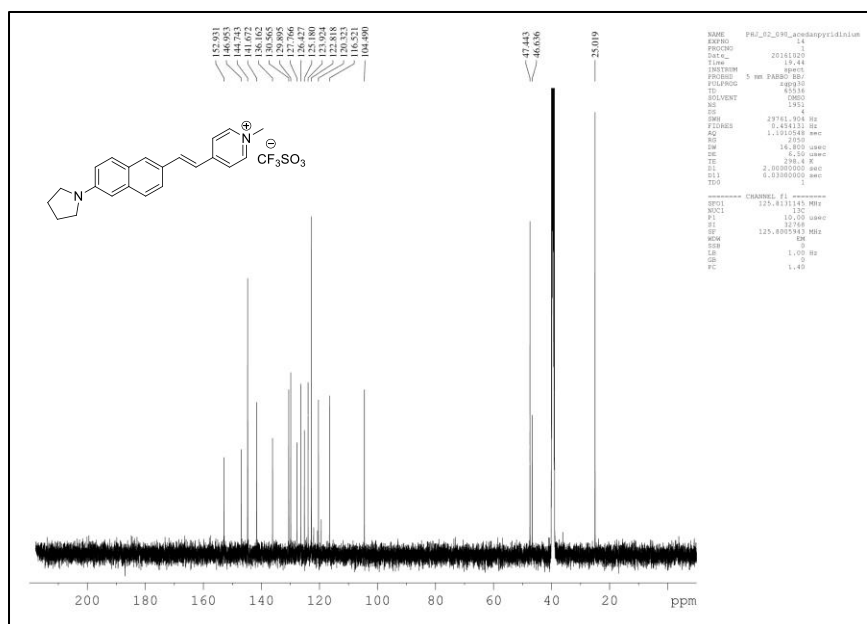

## HRMS data:

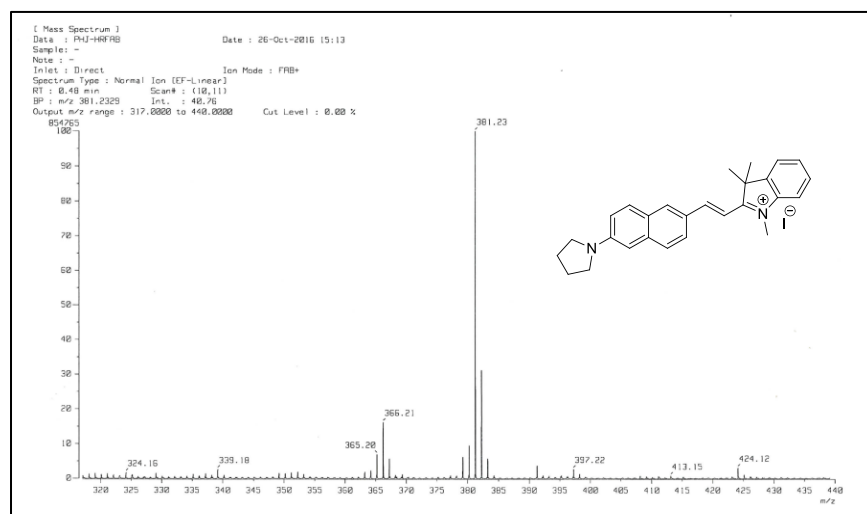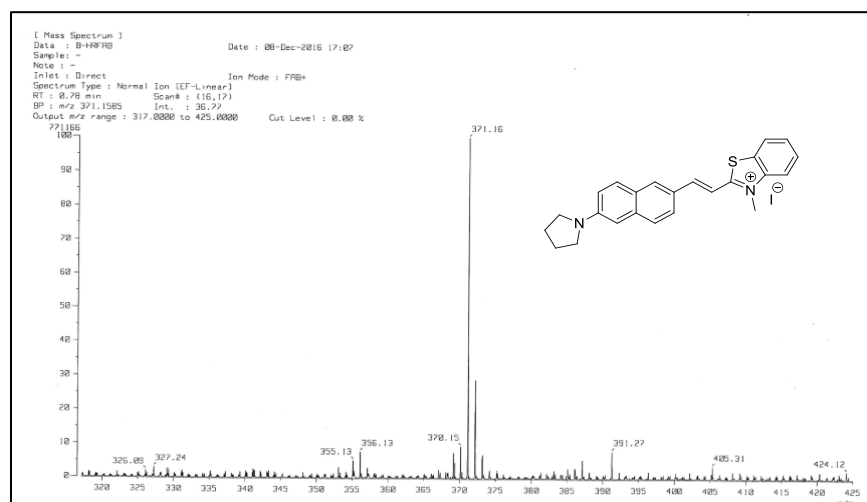

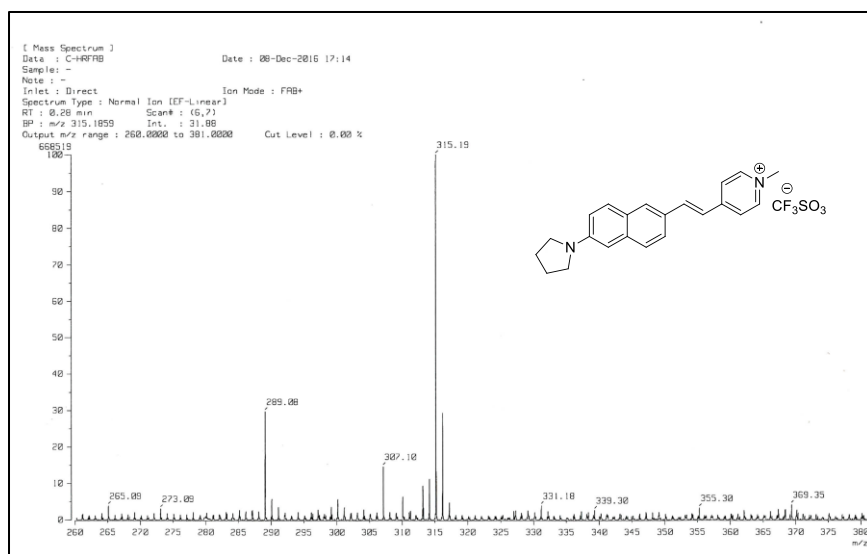

Supplement: d0cc01833c1.pdf [file d0cc01833c1.pdf]
